# Supplementary material
Source: MDPI journal article supplement (https://www.mdpi.com/2071-1050/14/21/14076)
Supplement: s1 [file s1]

Anexo II: Indicadores de sustentabilidade (ETIS) RAM

| Dimensão  | Indicador                                                                          | Relação | Ano    |        |         |         |         |         | I5   |         |         | I5    | I2      |         |         | I2    |
|-----------|------------------------------------------------------------------------------------|---------|--------|--------|---------|---------|---------|---------|------|---------|---------|-------|---------|---------|---------|-------|
|           |                                                                                    |         | 2016   | 2017   | 2018    | 2019    | 2020    | 2021    | MIN  | MAX     | X       | IT    | MIN     | MAX     | X       | I2    |
| Social    | <a href="#">Alojamento Acessível a Hóspedes com Necessidades Especiais</a>         | +       | 14.00  | 63.00  | 3.00    | 1.00    | 8.00    | 0.00    | 0.00 | 63.00   | 8.00    | 0.127 | 0.00    | 8.00    | 0.00    | 0.000 |
|           | <a href="#">Densidade Turística</a>                                                | +       | 0.00   | 28.58  | 28.52   | 25.49   | 8.35    | 0.00    | 0.00 | 28.58   | 8.35    | 0.292 | 0.00    | 8.35    | 0.00    | 0.000 |
|           | <a href="#">Intensidade Turística</a>                                              | +       | 0.00   | 9.41   | 9.40    | 8.39    | 2.75    | 0.00    | 0.00 | 9.41    | 2.75    | 0.292 | 0.00    | 2.75    | 0.00    | 0.000 |
|           | <a href="#">Número de Camas Disponíveis por 100 Residentes</a>                     | +       | 143.40 | 145.00 | 146.00  | 147.70  | 87.40   | 0.00    | 0.00 | 147.70  | 87.40   | 0.592 | 0.00    | 87.40   | 0.00    | 0.000 |
|           |                                                                                    | 4       |        |        |         |         |         |         |      | AVR     |         | 0.326 |         |         | AVR     | 0.000 |
| Económica | <a href="#">Emprego no Turismo por Escalão Etário, Género e Escolaridade</a>       | +       | 7500   | 10000  | 14500   | 14800   | 12700   | 15200   | 7500 | 15200   | 15200   | 1.000 | 12700   | 15200   | 15200   | 1.000 |
|           | <a href="#">Emprego no Turismo por Situação Profissional e Duração do Trabalho</a> | +       | 7500   | 10000  | 14500   | 14800   | 12700   | 15200   | 7500 | 15200   | 15200   |       | 12700   | 15200   | 15200   |       |
|           | <a href="#">Estabelecimentos Abertos Todo o Ano</a>                                | +       | 0      | 317    | 355     | 381     | 307     | 376     | 0    | 381     | 376     | 0.987 | 307     | 376     | 376     | 1.000 |
|           | <a href="#">Estada Média</a>                                                       | +       |        |        |         |         |         |         | 0    | 0       | 0       |       | 0       | 0       | 0       |       |
|           | <a href="#">Número de Dormidas</a>                                                 | +       | 0      | 0      | 7800000 | 7500000 | 2400000 | 4400000 | 0    | 7800000 | 4400000 | 0.564 | 2400000 | 4400000 | 4400000 | 1.000 |
|           | <a href="#">Receitas Turísticas</a>                                                | +       |        |        |         |         |         |         | 0    | 0       | 0       |       | 0       | 0       | 0       |       |
|           | <a href="#">Gasto Médio por Turista</a>                                            | +       | 0      | 80.5   | 71.2    | 66.1    | 65.3    | 0       | 0    | 80.5    | 65.3    | 0.811 | 0       | 65.3    | 0       | 0.000 |
|           | <a href="#">Número de Turistas</a>                                                 | +       |        |        |         |         |         |         | 0    | 0       | 0       |       | 0       | 0       | 0       |       |
|           | <a href="#">Proveito Médio por Dormida</a>                                         | +       |        |        |         |         |         |         | 0    | 0       | 0       |       | 0       | 0       | 0       |       |
|           | <a href="#">Receitas Turísticas no PIB</a>                                         | +       |        |        |         |         |         |         | 0    | 0       | 0       |       | 0       | 0       | 0       |       |
|           | <a href="#">Taxas de Ocupação</a>                                                  | +       | 77.5   | 78.1   | 73.9    | 69.8    | 28      | 45.6    | 28   | 78.1    | 45.6    | 0.351 | 28      | 45.6    | 45.6    | 1.000 |
|           | <a href="#">Taxa de Sazonalidade</a>                                               | -       | 31.5   | 31.2   | 30.7    | 30.8    | 24      | 46.4    | 24   | 46.4    | 46.4    | 0.000 | 24      | 46.4    | 46.4    | 0.000 |
|           |                                                                                    | 12      |        |        |         |         |         |         |      | AVR     |         | 0.619 |         |         | AVR     | 0.667 |
| Ambiental | <a href="#">Águas Balneares Consideradas Boas/Excelentes</a>                       | +       | 0      | 47     | 49      | 52      | 53      | 0       | 0    | 53      | 53      | 1.000 | 0       | 53      | 0       | 0.000 |
|           | <a href="#">Despesas em Ambiente por Residente por 1000 Residentes</a>             | +       | 0      | 0      | 0       | 0       | 118000  | 0       | 0    | 118000  | 118000  | 1.000 | 0       | 118000  | 0       | 0.000 |
|           | <a href="#">Consumo de Energia e Emissões de CO2 no Turismo</a>                    | -       |        |        |         |         |         |         | 0    | 0       | 0       |       | 0       | 0       | 0       |       |
|           | <a href="#">Estabelecimentos com Certificação</a>                                  | +       | 59.7   | 21     | 33      | 44      | 0       | 0       | 0    | 59.7    | 44      | 0.737 | 0       | 0       | 0       |       |
|           | <a href="#">Estabelecimentos que Otimizam o Consumo de Água</a>                    | +       | 67     | 73     | 70      | 80      | 0       | 0       | 0    | 80      | 80      | 1.000 | 0       | 0       | 0       |       |
|           | <a href="#">Estabelecimentos que Otimizam o Consumo de Energia</a>                 | +       | 64.7   | 73     | 68      | 72      | 0       | 0       | 0    | 73      | 72      | 0.986 | 0       | 0       | 0       |       |
|           | <a href="#">Estabelecimentos que Separam Resíduos</a>                              | +       | 73.9   | 70     | 71      | 74      | 0       | 0       | 0    | 74      | 74      | 1.000 | 0       | 0       | 0       |       |
|           | <a href="#">Resíduos Urbanos Gerados pelo Turismo</a>                              | -       | 9046   | 9766   | 9767    | 9585    | 3142    | 0       | 0    | 9767    | 3142    | 0.678 | 0       | 3142    | 0       | 1.000 |
|           | <a href="#">Zonas Balneares com Bandeira Azul</a>                                  | +       | 12     | 13     | 14      | 17      | 16      | 16      | 12   | 17      | 16      | 0.800 | 16      | 16      | 16      |       |
|           |                                                                                    | 9       |        |        |         |         |         |         |      | AVR     |         | 0.900 |         |         | AVR     | 0.333 |
