# Supplementary material
Source: MDPI journal article supplement (https://www.mdpi.com/2071-1050/14/21/14076)
Supplement: s1 [file s1]

Indicadores de sustentabilidade (ETIS) Açores

Anexo I: Indicadores de sustentabilidade (ETIS) Açores

| Dimensão  | Indicador                                                                          | Relação | Ano   |       |         |         |        |         | IT   |         |         | IT    | I2     |         |         | I2    |
|-----------|------------------------------------------------------------------------------------|---------|-------|-------|---------|---------|--------|---------|------|---------|---------|-------|--------|---------|---------|-------|
|           |                                                                                    |         | 2016  | 2017  | 2018    | 2019    | 2020   | 2021    | MIN  | MAX     | X       | IT    | MIN    | MAX     | X       | I2    |
| Social    | <a href="#">Alojamento Acessível a Hóspedes com Necessidades Especiais</a>         | +       | 2.00  | 24.00 | 5.00    | 3.00    | 14.00  | 0.00    | 0.00 | 24.00   | 14.00   | 0.583 | 0.00   | 14.00   | 0.00    | 0.000 |
|           | <a href="#">Densidade Turística</a>                                                | +       | 0.00  | 2.13  | 2.43    | 2.61    | 0.73   | 0.00    | 0.00 | 2.61    | 0.73    | 0.280 | 0.00   | 0.73    | 0.00    | 0.000 |
|           | <a href="#">Intensidade Turística</a>                                              | +       | 0.00  | 2.41  | 2.78    | 2.98    | 0.84   | 0.00    | 0.00 | 2.98    | 0.84    | 0.282 | 0.00   | 0.84    | 0.00    | 0.000 |
|           | <a href="#">Número de Camas Disponíveis por 100 Residentes</a>                     | +       | 47.40 | 50.00 | 60.00   | 71.00   | 44.40  | 0.00    | 0.00 | 71.00   | 44.40   | 0.625 | 0.00   | 44.40   | 0.00    | 0.000 |
|           |                                                                                    | 4       |       |       |         |         |        |         |      |         | AVR     | 0.443 |        |         | AVR     | 0.000 |
| Económica | <a href="#">Emprego no Turismo por Escalão Etário, Género e Escolaridade</a>       | +       | 0     | 0     | 0       | 0       | 0      | 6300    | 0    | 6300    | 6300    | 1.000 | 0      | 6300    | 6300    | 1.000 |
|           | <a href="#">Emprego no Turismo por Situação Profissional e Duração do Trabalho</a> | +       | 0     | 0     | 0       | 0       | 0      | 6300    | 0    | 6300    | 6300    | 1.000 | 0      | 6300    | 6300    | 1.000 |
|           | <a href="#">Estabelecimentos Abertos Todo o Ano</a>                                | +       | 0     | 82.2  | 82.1    | 80.3    | 63.5   | 75.9    | 0    | 82.2    | 75.9    | 0.923 | 63.5   | 75.9    | 75.9    | 1.000 |
|           | <a href="#">Estada Média</a>                                                       | +       | 0     | 0     | 0       | 0       | 0      | 0       | 0    | 0       | 0       |       | 0      | 0       | 0       |       |
|           | <a href="#">Número de Dormidas</a>                                                 | +       | 0     | 0     | 2100000 | 2300000 | 654400 | 1400000 | 0    | 2300000 | 1400000 | 0.609 | 654400 | 1400000 | 1400000 | 1.000 |
|           | <a href="#">Receitas Turísticas</a>                                                | +       | 0     | 0     | 0       | 0       | 0      | 0       | 0    | 0       | 0       |       | 0      | 0       | 0       |       |
|           | <a href="#">Gasto Médio por Turista</a>                                            | +       | 0     | 90.7  | 82.4    | 78.5    | 73.2   | 0       | 0    | 90.7    | 73.2    | 0.807 | 0      | 73.2    | 0       | 0.000 |
|           | <a href="#">Número de Turistas</a>                                                 | +       | 0     | 0     | 0       | 0       | 0      | 0       | 0    | 0       | 0       |       | 0      | 0       | 0       |       |
|           | <a href="#">Proveito Médio por Dormida</a>                                         | +       | 0     | 0     | 0       | 0       | 0      | 0       | 0    | 0       | 0       |       | 0      | 0       | 0       |       |
|           | <a href="#">Receitas Turísticas no PIB</a>                                         | +       | 0     | 0     | 0       | 0       | 0      | 0       | 0    | 0       | 0       |       | 0      | 0       | 0       |       |
|           | <a href="#">Taxas de Ocupação</a>                                                  | +       | 58.5  | 61.6  | 59.8    | 61.7    | 22.7   | 44.4    | 22.7 | 61.7    | 44.4    | 0.556 | 22.7   | 44.4    | 44.4    | 1.000 |
|           | <a href="#">Taxa de Sazonalidade</a>                                               | -       | 40.2  | 40.1  | 40.8    | 39.9    | 37.7   | 50.1    | 37.7 | 50.1    | 50.1    | 0.000 | 37.7   | 50.1    | 50.1    | 0.000 |
|           |                                                                                    | 12      |       |       |         |         |        |         |      |         | AVR     | 0.699 |        |         | AVR     | 0.714 |
| Ambiental | <a href="#">Águas Balneares Consideradas Boas/Excelentes</a>                       | +       | 0     | 56    | 56      | 59      | 57     | 0       | 0    | 59      | 57      | 0.966 | 0      | 57      | 0       | 0.000 |
|           | <a href="#">Despesas em Ambiente por Residente por 1000 Residentes</a>             | +       | 0     | 0     | 0       | 0       | 58000  | 0       | 0    | 58000   | 58000   | 1.000 | 0      | 58000   | 0       | 0.000 |
|           | <a href="#">Consumo de Energia e Emissões de CO2 no Turismo</a>                    | -       | 0     | 0     | 0       | 0       | 0      | 0       | 0    | 0       | 0       |       | 0      | 0       | 0       |       |
|           | <a href="#">Estabelecimentos com Certificação</a>                                  | +       | 46.9  | 33    | 33      | 33      | 0      | 0       | 0    | 46.9    | 33      | 0.704 | 0      | 0       | 0       |       |
|           | <a href="#">Estabelecimentos que Otimizam o Consumo de Água</a>                    | +       | 62    | 64    | 64      | 71      | 0      | 0       | 0    | 71      | 71      | 1.000 | 0      | 0       | 0       |       |
|           | <a href="#">Estabelecimentos que Otimizam o Consumo de Energia</a>                 | +       | 62    | 58    | 58      | 59      | 0      | 0       | 0    | 62      | 59      | 0.952 | 0      | 0       | 0       |       |
|           | <a href="#">Estabelecimentos que Separam Resíduos</a>                              | +       | 69    | 69    | 69      | 72      | 0      | 0       | 0    | 72      | 72      | 1.000 | 0      | 0       | 0       |       |
|           | <a href="#">Resíduos Urbanos Gerados pelo Turismo</a>                              | -       | 2331  | 2815  | 3326    | 3652    | 1039   | 0       | 0    | 3652    | 1039    | 0.715 | 0      | 1039    | 0       | 1.000 |
|           | <a href="#">Zonas Balneares com Bandeira Azul</a>                                  | +       | 34    | 34    | 37      | 39      | 42     | 45      | 34   | 45      | 45      | 1.000 | 42     | 45      | 45      | 1.000 |
|           |                                                                                    | 9       |       |       |         |         |        |         |      |         | AVR     | 0.917 |        |         | AVR     | 0.500 |
